# Supplementary material for: Autosomal Recessive Transmission of a Rare KRT74 Variant Causes Hair and Nail Ectodermal Dysplasia: Allelism with Dominant Woolly Hair/Hypotrichosis
Source: PubMed Central journal article supplement (PMC3979697; doi:10.1371/journal.pone.0093607), 2014-04-08

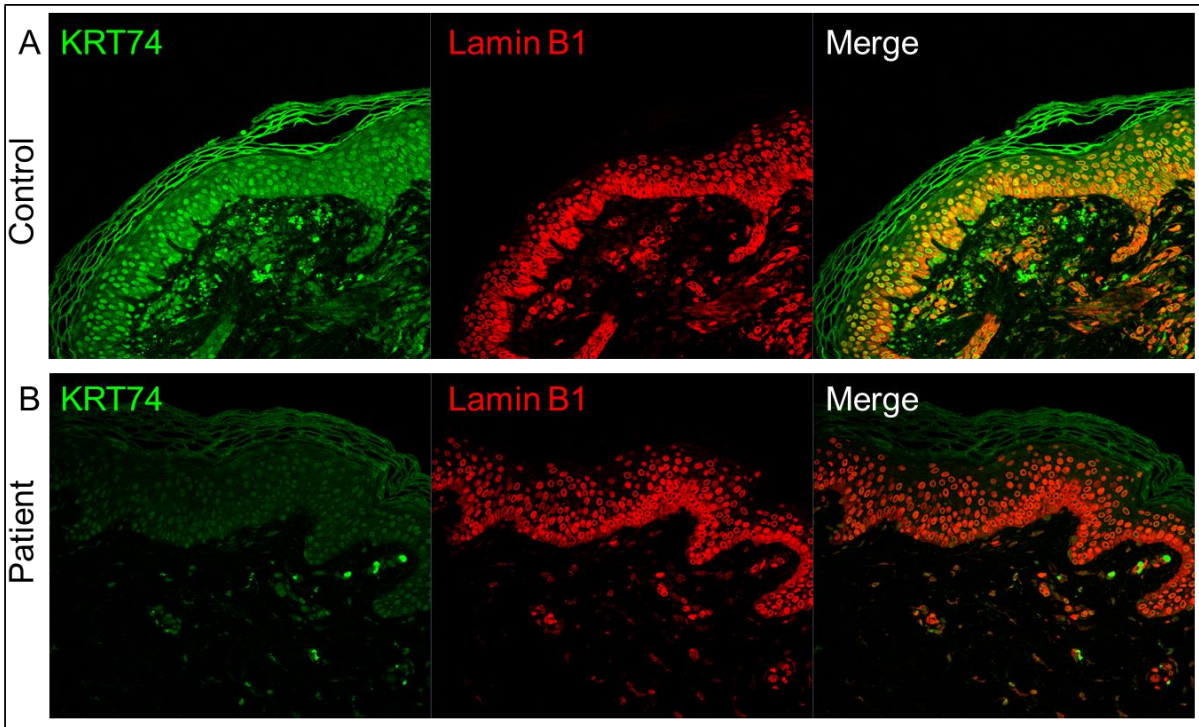

Supplement: pone.0093607.s002.pdf [file pone.0093607.s002.pdf]
